# Supplementary material for: Separation logic
Source: Atypon-hosted journal article supplement (doi:10.1145/3211968), 2019-01-28
Supplement: p86-o_hearn-supp.pdf [file p86-o_hearn-supp.pdf]

 


skip to main content

- Advanced Search
- Browse
- About
- - Sign in
  - Register

- Advanced Search
- Journals
- Magazines
- Proceedings
- Books
- SIGs
- Conferences
- People
- More

Search ACM Digital Library

SearchSearch

Advanced Search

We use cookies to ensure that we give you the best experience on our website.

Learn more

It seems your browser doesn't support them and this affects the site functionality.

## Footer

### Categories

- Journals
- Magazines
- Books
- Proceedings
- SIGs
- Conferences
- Collections
- People

### About

- About ACM Digital Library
- ACM Digital Library Board
- Subscription Information
- Author Guidelines
- Using ACM Digital Library
- All Holdings within the ACM Digital Library
- ACM Computing Classification System
- Digital Library Accessibility

### Join

- Join ACM
- Join SIGs
- Subscribe to Publications
- Institutions and Libraries

### Connect

- Contact
- Facebook
- X
- Linkedin
- Feedback
- Bug Report

The ACM Digital Library is published by the Association for Computing Machinery. Copyright © 2024 ACM, Inc.

- Terms of Usage
- Privacy Policy
- Code of Ethics

Your Search Results Download Request

We are preparing your search results for download ...

We will inform you here when the file is ready.

Download now!

Your Search Results Download Request

Your file of search results citations is now ready.

Download now!

Your Search Results Download Request

Your search export query has expired. Please try again.
